# Supplementary material for: Interaction and reaction of the hydroxyl ion with β-d-galactose and its hydrated complex: an ab initio molecular dynamics study
Source: Royal Society of Chemistry journal article supplement (doi:10.1039/c2cp41593c), 2012-01-01
Supplement: c2cp41593c.pdf [file c2cp41593c.pdf]

# **Interaction and Reaction of Hydroxyl Ion with $\beta$ -D-Galactose and its Hydrated Complex: An Ab Initio Molecular Dynamics Study**

**Hong-Bin Xie<sup>a,b\*</sup> and R. Benny Gerber<sup>b,c\*</sup>**

<sup>a</sup> Key Laboratory of Industrial Ecology and Environmental Engineering (MOE), School of Environmental Science and Technology, Dalian University of Technology, Linggong road 2, Dalian 116024, China E-mail: hbxie@dlut.edu.cn

<sup>b</sup> Department of Chemistry, University of California, Irvine, California 92697-2025, United States; E-mail: benny@fh.huji.ac.il

<sup>c</sup> Institute of Chemistry and The Fritz Haber Research Center, The Hebrew University, Jerusalem 91904, Israel

## Supporting Information:

### S1: Details for searching for global minimum of $\beta$ -D-galactose+OH<sup>-</sup>

We took the minima (four structures with lower energy) of  $\beta$ -D-galactose from recent reference<sup>1</sup> as the initial structures. According to scheme 1, 20 initial structures were built for  $\beta$ -D-galactose +OH<sup>-</sup> using the four  $\beta$ -D-galactose minima. Then, they were optimized at BLYP-D/def2-TZVP and SOS-RIMP2/def2-TZVP level with Turbomole<sup>2</sup> package. All optimizations lead to Deprotonated  $\beta$ -D-Galactose anion (**Dep-beta-D-G**)<sup>-</sup>+H<sub>2</sub>O. The energy information is presented in Table S1.

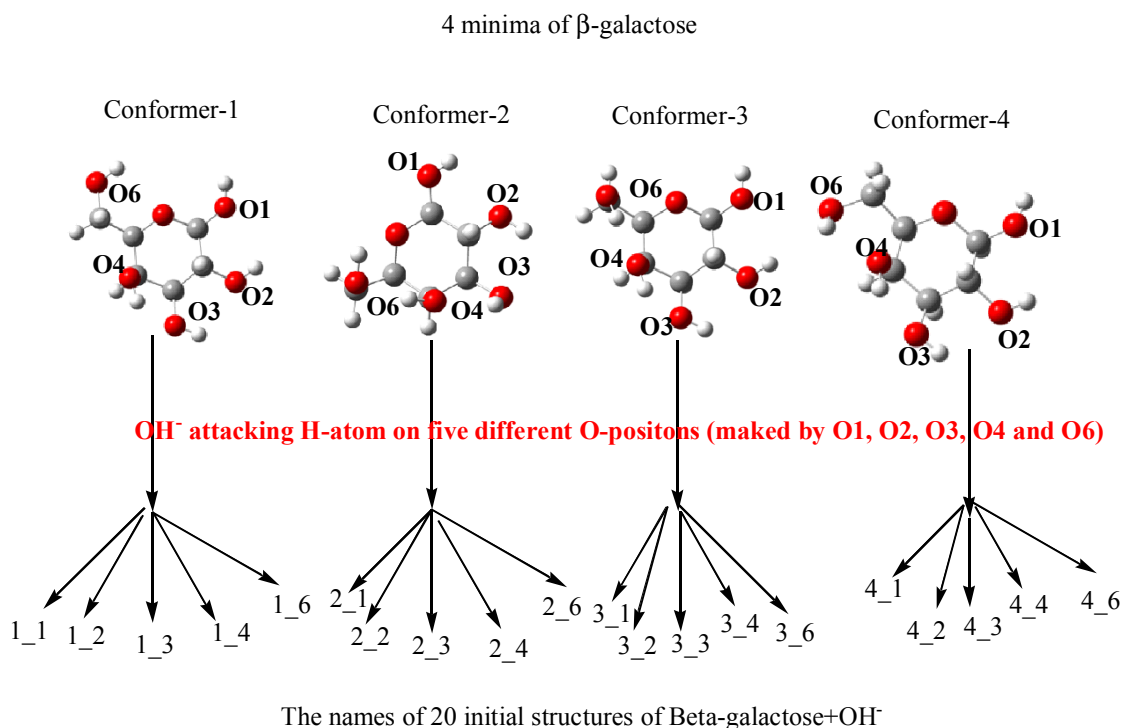

**Scheme S1: The scheme to build initial structures of  $\beta$ -D-galactose+OH<sup>-</sup>**

**Table S1: Relative energy (kcal/mol) of 20 conformers at BLYP-D/def2-TZVP and SOS-RIMP2/def2-TZVP () level, respectively.**

| Isomer | Relative energy | Isomer | Relative energy |
|--------|-----------------|--------|-----------------|
| 1_1    | 2.8 (2.6)       | 3_1    | 4.4 (5.6)       |
| 1_2    | 11.8 (10.8)     | 3_2    | 12.0 (11.6)     |
| 1_3    | 11.9 (11.1)     | 3_3    | 9.9 (9.4)       |
| 1_4    | 19.4 (18.8)     | 3_4    | 8.7 (9.4)       |
| 1_6    | 22.5 (22.7)     | 3_6    | 28.9 (30.6)     |
| 2_1    | 4.4 (10.0)      | 4_1    | 3.8 (4.4)       |
| 2_2    | 8.8 (10.1)      | 4_2    | 12.4 (11.5)     |
| 2_3    | 13.2 (14.2)     | 4_3    | 10.7 (10.0)     |
| 2_4    | 0.0 (0.0)       | 4_4    | 8.7 (9.4)       |
| 2_6    | 1.7 (2.0)       | 4_6    | 21.9 (22.4)     |

### S2: Computational details for dynamics of $\beta$ -galactose+OH<sup>-</sup>

Density function theory (DFT) with the BLYP functional along with a triple- $\xi$  valence polarized basis set (TZVP) within the resolution-of-the-identity (RI)<sup>3</sup> approximation was used to conduct Ab Initio Molecular Dynamics calculations. A general drawback of most standard DFT methods is that they do not describe van der Waals (vdW, dispersive) forces<sup>4</sup>. The dispersion correction introduced by S. Grimme<sup>5</sup> for the BLYP functional is adopted, since van der Waals interactions may play a role in the system studied. We used Nosé-Hoover thermostat<sup>6,7</sup> to keep temperature of the system. One time step was 0.5 fs. The total length of each Ab Initio Molecular Dynamics (AIMD) simulation was 10 ps. Calculations were conducted using TURBOMOLE<sup>2</sup> package. For the systems we run multiple trajectories, particle momenta were sampled from the Maxwell distribution at the inverse temperature.

### S3: Videos describing the trajectories of the simulations

The representative trajectories for  $\beta$ -D-galactose +OH<sup>-</sup>+(H<sub>2</sub>O)<sub>n</sub>(n=0,1 and 2) are attached. In the process of making videos, we save one snapshot in every 5 fs.

Reference:

1. Momany, F. A.; Appell, M.; Willett, J. L.; Schnupf, U.; Bosma, W. B. Carbohydrate Research 2006, 341, 525.
2. Ahlrichs, R.; Bär, M.; Häser, M.; Horn, H.; Kölmel, C. Chem. Phys. Lett. 1989, 162, 165.

3. Eichkorn, K.; Weigend, F.; Treutler, O.; Ahlrichs, R. *Theor.l Chem. Acc.*, 1997, 97, 119.
4. Grimme, S. J. *Comput. Chem.* 2006, 27, 1787.
5. Grimme, S. J. *Comput. Chem.* 2004, 25, 1463.
6. Nose, S. J. *Chem. Phys.* 1984, 81, 511.
7. Hoover, W. G. *Phys.Rev. A.* 1985, 31, 1695.
